# Supplementary material for: Genotype–Phenotype Correlation in Children: The Impact of FBN1 Variants on Pediatric Marfan Care
Source: MDPI journal article supplement (doi:10.3390/genes11070799), 2020-07-15
Supplement: s1 [file s1]

## Supplementary Materials

**Table S1** Missense/ in-frame vs. splicing mutation (SV, sinus of Valsalva; MVP, mitral valve prolapse; TVP, tricuspid valve prolapse, PA dilatation, pulmonary artery dilatation; David, David surgery; Facial features (>3 of enophthalmus, dolichocephaly, downslanting palpebral fissures, malar hypoplasia, retrognathia), foot deformity (pes planus or hindfoot deformity).

|                                 | Prevalence         |               |               | Age of onset       |            |               |
|---------------------------------|--------------------|---------------|---------------|--------------------|------------|---------------|
|                                 | Missense/ in-frame | Splicing      | p-value       | Missense/ in-frame | Splicing   | p-value       |
| SV dilatation                   | 35/62 (56.5%)      | 7/14 (50.0%)  | ns            | 7.4 ± 0.5          | 9.4 ± 6.9  | ns            |
| MVP                             | 31/62 (50.0%)      | 9/14 (64.3%)  | ns            | 7.8 ± 5.7          | 10.0 ± 5.9 | ns            |
| TVP                             | 38/62 (61.3%)      | 11/14 (78.6%) | ns            | 6.9 ± 5.6          | 10.0 ± 6.1 | ns            |
| PA dilatation                   | 6/61 (9.8%)        | 2/14 (14.3%)  | ns            | 4.3 ± 5.1          | 10.5 ± 9.1 | ns            |
| David                           | 5/62 (8.1%)        | 0/14 (0.0%)   | ns            | 13.1 ± 5.5         | -          | -             |
| Medication                      | 35/62 (56.5%)      | 8/14 (57.1%)  | ns            | 7.6 ± 5.1          | 11.5 ± 4.1 | ns            |
| Dural ectasia                   | 21/61 (34.4%)      | 7/14 (50.0%)  | ns            | 11.1 ± 4.9         | 14.7 ± 3.4 | ns            |
| High arched palate              | 33/62 (53.2%)      | 9/14 (64.3%)  | ns            | 9.0 ± 5.1          | 11.4 ± 4.8 | ns            |
| Facial feature                  | 24/62 (38.7%)      | 3/14 (21.4%)  | ns            | 5.9 ± 5.8          | 5.5 ± 3.3  | ns            |
| Arm-span-to-height ratio > 1.05 | 15/62 (24.2%)      | 5/14 (35.7%)  | ns            | 11.0 ± 4.7         | 10.2 ± 5.9 | ns            |
| Pectus excavatum                | 6/62 (9.7%)        | 6/14 (42.9%)  | <b>0.0067</b> | 7.5 ± 6.7          | 7.7 ± 4.4  | ns            |
| Pectus carinatum                | 15/62 (24.2%)      | 2/14 (14.3%)  | ns            | 10.4 ± 4.9         | 14.7 ± 2.6 | ns            |
| scoliosis                       | 22/62 (35.5%)      | 5/14 (35.7%)  | ns            | 10.0 ± 4.7         | 10.9 ± 5.2 | ns            |
| Wrist and thumb sign            | 7/62 (11.3%)       | 3/14 (21.4%)  | ns            | 10.5 ± 4.6         | 9.2 ± 6.7  | ns            |
| Foot deformity                  | 35/62 (56.5%)      | 7/14 (50.0%)  | ns            | 7.6 ± 5.5          | 8.8 ± 4.7  | ns            |
| Reduced elbow-extension         | 9/62 (14.5%)       | 0/14 (0.0%)   | ns            | 10.5 ± 6.8         | -          | ns            |
| Ectopia lentis                  | 23/62 (37.1%)      | 4/14 (28.6%)  | ns            | 7.4 ± 5.5          | 10.1 ± 6.4 | ns            |
| Myopia                          | 14/61 (23.0%)      | 3/14 (21.4%)  | ns            | 6.3 ± 4.4          | 7.5 ± 7.2  | ns            |
| Skin striae                     | 14/62 (22.6%)      | 4/14 (28.6%)  | ns            | 13.4 ± 3.4         | 13.1 ± 4.1 | ns            |
| Hernia                          | 3/62 (4.8%)        | 1/14 (7.1%)   | ns            | 5.3 ± 1.4          | 12.9 ± 0.0 | <b>0.0416</b> |
| pneumothorax                    | 4/62 (6.5%)        | 0/14 (0%)     | ns            | 15.1 ± 0.6         | -          | ns            |
| Systemic score ≥ 7              | 21/59 (35.6%)      | 4/14 (28.6%)  | ns            | 11.1 ± 5.5         | 14.1 ± 2.1 | ns            |

**Table S2** Missense/ in-frame vs. nonsense/ frameshift mutations (SV, sinus of Valsalva; MVP, mitral valve prolapse; TVP, tricuspid valve prolapse, PA dilatation, pulmonary artery dilatation; David, David surgery; Facial features (>3 of enophthalmus, dolichocephaly, downslanting palpebral fissures, malar hypoplasia, retrognathia), foot deformity (pes planus or hindfoot deformity).

|               | Prevalence         |                      |         | Age of onset       |                      |         |
|---------------|--------------------|----------------------|---------|--------------------|----------------------|---------|
|               | Missense/ in-frame | Nonsense/ frameshift | p-value | Missense/ in-frame | Nonsense/ frameshift | p-value |
| SV dilatation | 35/62 (56.5%)      | 18/29 (62.1%)        | ns      | 7.4 ± 0.5          | 8.5 ± 4.5            | ns      |
| MVP           | 31/62 (50.0%)      | 18/29 (62.1%)        | ns      | 7.8 ± 5.7          | 9.1 ± 4.0            | ns      |

|                                 |               |               |               |            |            |               |
|---------------------------------|---------------|---------------|---------------|------------|------------|---------------|
| TVP                             | 38/62 (61.3%) | 21/28 (75.0%) | ns            | 6.9 ± 5.6  | 7.6 ± 4.6  | ns            |
| PA dilatation                   | 6/61 (9.8%)   | 2/29 (6.9%)   | ns            | 4.3 ± 5.1  | 15.4 ± 4.1 | <b>0.0334</b> |
| David                           | 5/62 (8.1%)   | 1/29 (3.4%)   | ns            | 13.1 ± 5.5 | 13.5 ± 0.0 | ns            |
| Medication                      | 35/62 (56.5%) | 21/29 (72.4%) | ns            | 7.6 ± 5.1  | 8.7 ± 4.9  | ns            |
| Dural ectasia                   | 21/61 (34.4%) | 19/28 (67.8%) | <b>0.0054</b> | 11.1 ± 4.9 | 11.1 ± 3.8 | ns            |
| High arched palate              | 33/62 (53.2%) | 19/29 (65.5%) | ns            | 9.0 ± 5.1  | 8.9 ± 4.7  | ns            |
| Facial feature                  | 24/62 (38.7%) | 6/29 (20.7%)  | ns            | 5.9 ± 5.8  | 7.2 ± 2.3  | ns            |
| Arm-span-to-height ratio > 1.05 | 15/62 (24.2%) | 13/29 (44.8%) | ns            | 11.0 ± 4.7 | 11.4 ± 4.0 | ns            |
| Pectus excavatum                | 6/62 (9.7%)   | 7/29 (24.1%)  | ns            | 7.5 ± 6.7  | 9.9 ± 4.1  | ns            |
| Pectus carinatum                | 15/62 (24.2%) | 7/29 (24.1%)  | ns            | 10.4 ± 4.9 | 9.9 ± 3.4  | ns            |
| scoliosis                       | 22/62 (35.5%) | 11/29 (37.9%) | ns            | 10.0 ± 4.7 | 9.7 ± 5.3  | ns            |
| Wrist and thumb sign            | 7/62 (11.3%)  | 7/29 (24.1%)  | ns            | 10.5 ± 4.6 | 11.9 ± 3.2 | ns            |
| Foot deformity                  | 35/62 (56.5%) | 17/29 (58.6%) | ns            | 7.6 ± 5.5  | 8.1 ± 4.0  | ns            |
| Reduced elbow-extension         | 9/62 (14.5%)  | 3/28 (10.7%)  | ns            | 10.5 ± 6.8 | 11.8 ± 4.8 | ns            |
| Ectopia lentis                  | 23/62 (37.1%) | 2/29 (6.9%)   | <b>0.0023</b> | 7.4 ± 5.5  | 9.1 ± 4.9  | ns            |
| Myopia                          | 14/61 (23.0%) | 5/29 (17.2%)  | ns            | 6.3 ± 4.4  | 5.5 ± 4.1  | ns            |
| Skin striae                     | 14/62 (22.6%) | 6/29 (20.7%)  | ns            | 13.4 ± 3.4 | 14.1 ± 2.1 | ns            |
| Hernia                          | 3/62 (4.8%)   | 4/29 (13.8%)  | ns            | 5.3 ± 1.4  | 7.3 ± 3.5  | ns            |
| pneumothorax                    | 4/62 (6.5%)   | 1/29 (3.4%)   | ns            | 15.1 ± 0.6 | 14.5 ± 0.0 | ns            |
| Systemic score ≥ 7              | 21/59 (35.6%) | 13/29 (44.8%) | ns            | 11.1 ± 5.5 | 11.3 ± 4.1 | ns            |

**Table S3** Nonsense/ frameshift mutations vs. Splicing mutations (SV, sinus of Valsalva; MVP, mitral valve prolapse; TVP, tricuspid valve prolapse, PA dilatation, pulmonary artery dilatation; David, David surgery; Facial features (>3 of enophthalmus, dolichocephaly, downslanting palpebral fissures, malar hypoplasia, retrognathia), foot deformity (pes planus or hindfoot deformity).

|                                 | Prevalence              |               |             | Age of onset (years)        |            |             |
|---------------------------------|-------------------------|---------------|-------------|-----------------------------|------------|-------------|
|                                 | Nonsense/<br>frameshift | Splicing      | p-<br>value | Nonsense<br>/<br>frameshift | Splicing   | p-<br>value |
| SV dilatation                   | 18/29 (62.1%)           | 7/14 (50.0%)  | ns          | 8.5 ± 4.5                   | 9.4 ± 6.9  | ns          |
| MVP                             | 18/29 (62.1%)           | 9/14 (64.3%)  | ns          | 9.1 ± 4.0                   | 10.0 ± 5.9 | ns          |
| TVP                             | 21/28 (75.0%)           | 11/14 (78.6%) | ns          | 7.6 ± 4.6                   | 10.0 ± 6.1 | ns          |
| PA dilatation                   | 2/29 (6.9%)             | 2/14 (14.3%)  | ns          | 15.4 ± 4.1                  | 10.5 ± 9.1 | ns          |
| BAV                             | 1/28 (3.5%)             | 0/14 (0%)     | ns          | 17.7 ± 0.0                  | -          | -           |
| Medication                      | 21/29 (72.4%)           | 8/14 (57.1%)  | ns          | 8.7 ± 4.9                   | 11.5 ± 4.1 | ns          |
| Dural ectasia                   | 19/28 (67.8%)           | 7/14 (50.0%)  | ns          | 11.1 ± 3.8                  | 14.7 ± 3.4 | ns          |
| High arched palate              | 19/29 (65.5%)           | 9/14 (64.3%)  | ns          | 8.9 ± 4.7                   | 11.4 ± 4.8 | ns          |
| Facial feature                  | 6/29 (20.7%)            | 3/14 (21.4%)  | ns          | 7.2 ± 2.3                   | 5.5 ± 3.3  | ns          |
| Arm-span-to-height ratio > 1.05 | 13/29 (44.8%)           | 5/14 (35.7%)  | ns          | 11.4 ± 4.0                  | 10.2 ± 5.9 | ns          |
| Pectus excavatum                | 7/29 (24.1%)            | 6/14 (42.9%)  | ns          | 9.9 ± 4.1                   | 7.7 ± 4.4  | ns          |

|                         |               |              |    |            |            |    |
|-------------------------|---------------|--------------|----|------------|------------|----|
| Pectus carinatum        | 7/29 (24.1%)  | 2/14 (14.3%) | ns | 9.9 ± 3.4  | 14.7 ± 2.6 | ns |
| scoliosis               | 11/29 (37.9%) | 5/14 (35.7%) | ns | 9.7 ± 5.3  | 10.9 ± 5.2 | ns |
| Wrist and thumb sign    | 7/29 (24.1%)  | 3/14 (21.4%) | ns | 11.9 ± 3.2 | 9.2 ± 6.7  | ns |
| Foot deformity          | 17/29 (58.6%) | 7/14 (50.0%) | ns | 8.1 ± 4.0  | 8.8 ± 4.7  | ns |
| Reduced elbow-extension | 3/28 (10.7%)  | 0/14 (0%)    | ns | 11.8 ± 4.8 | -          | ns |
| Ectopia lentis          | 2/29 (6.9%)   | 4/14 (28.6%) | ns | 9.1 ± 4.9  | 10.1 ± 6.4 | ns |
| Myopia                  | 5/29 (17.2%)  | 3/14 (21.4%) | ns | 5.5 ± 4.1  | 7.5 ± 7.2  | ns |
| Skin striae             | 6/29 (20.7%)  | 4/14 (28.6%) | ns | 14.1 ± 2.1 | 13.1 ± 4.1 | ns |
| Hernia                  | 4/29 (13.8%)  | 1/14 (7.1%)  | ns | 7.3 ± 3.5  | 12.9 ± 0.0 | ns |
| pneumothorax            | 1/29 (3.4%)   | 0/14 (0%)    | ns | 14.6 ± 0.0 | -          | ns |
| Systemic score ≥ 7      | 13/29 (44.8%) | 4/14 (28.6%) | ns | 11.3 ± 4.1 | 14.1 ± 2.1 | ns |

**Table S4** Missense mutations involving a cysteine (cys-missense) vs. Missense mutations not involving a cysteine (non-cys-missense) (SV, sinus of Valsalva; MVP, mitral valve prolapse; TVP, tricuspid valve prolapse, PA dilatation, pulmonary artery dilatation; David, David surgery; Facial features (>3 of enophthalmus, dolichocephaly, downslanting palpebral fissures, malar hypoplasia, retrognathia), foot deformity (pes planus or hindfoot deformity).

|                                 | Prevalence    |                  |               | Age of onset |                  |               |
|---------------------------------|---------------|------------------|---------------|--------------|------------------|---------------|
|                                 | cys-missense  | non-cys-missense | p-value       | cys-missense | non-cys-missense | p-value       |
| SV dilatation                   | 23/34 (67.6%) | 9/24 (37.5%)     | <b>0.0327</b> | 6.3 ± 5.6    | 8.6 ± 6.3        | ns            |
| MVP                             | 18/34 (52.9%) | 11/24 (45.8%)    | ns            | 6.5 ± 5.6    | 10.5 ± 5.8       | ns            |
| TVP                             | 25/34 (73.5%) | 10/24 (41.7%)    | <b>0.0281</b> | 6.3 ± 4.9    | 8.2 ± 7.6        | ns            |
| PA dilatation                   | 2/34 (5.9%)   | 4/23 (17.4%)     | ns            | 2.1 ± 1.7    | 5.4 ± 6.2        | ns            |
| David                           | 4/34 (11.8%)  | 1/24 (4.2%)      | ns            | 13.6 ± 6.2   | 10.9 ± 0.0       | ns            |
| Medication                      | 24/34 (70.6%) | 7/24 (29.2%)     | <b>0.003</b>  | 7.5 ± 5.3    | 7.7 ± 5.2        | ns            |
| Dural ectasia                   | 13/34 (38.2%) | 7/24 (29.2%)     | ns            | 10.5 ± 5.7   | 11.8 ± 3.7       | ns            |
| High arched palate              | 18/34 (52.9%) | 13/24 (54.2%)    | ns            | 7.9 ± 5.0    | 10.6 ± 4.9       | ns            |
| Facial feature                  | 13/34 (38.2%) | 9/24 (37.5%)     | ns            | 5.1 ± 5.6    | 7.6 ± 6.6        | ns            |
| Arm-span-to-height ratio > 1.05 | 5/34 (14.7%)  | 9/24 (37.5%)     | ns            | 10.1 ± 5.3   | 11.9 ± 4.6       | ns            |
| Pectus excavatum                | 3/34 (8.8%)   | 3/24 (12.5%)     | ns            | 6.9 ± 6.2    | 8.4 ± 10.0       | ns            |
| Pectus carinatum                | 9/34 (26.5%)  | 5/24 (20.8%)     | ns            | 8.4 ± 4.0    | 12.7 ± 4.8       | ns            |
| scoliosis                       | 11/34 (32.4%) | 10/24 (41.7%)    | ns            | 8.4 ± 4.9    | 11.3 ± 4.2       | ns            |
| Wrist and thumb sign            | 3/34 (8.8%)   | 3/24 (12.5%)     | ns            | 8.5 ± 3.8    | 11.7 ± 5.4       | ns            |
| Foot deformity                  | 22/34 (64.7%) | 11/24 (45.8%)    | ns            | 6.6 ± 5.0    | 9.8 ± 5.8        | ns            |
| Reduced elbow-extension         | 5/34 (14.7%)  | 4/24 (16.7%)     | ns            | 12.9 ± 7.1   | 6.5 ± 5.0        | ns            |
| Ectopia lentis                  | 15/34 (44.1%) | 6/24 (25.0%)     | ns            | 5.8 ± 5.3    | 9.8 ± 5.7        | ns            |
| Myopia                          | 7/34 (20.6%)  | 4/23 (17.4%)     | ns            | 3.7 ± 2.2    | 9.6 ± 4.8        | <b>0.0245</b> |
| Skin striae                     | 5/34 (14.7%)  | 8/24 (33.3%)     | ns            | 13.2 ± 5.2   | 13.3 ± 2.1       | ns            |
| Hernia                          | 2/34 (5.9%)   | 1/24 (4.2%)      | ns            | 5.7 ± 1.6    | 4.4 ± 0          | ns            |
| pneumothorax                    | 2/34 (5.9%)   | 1/24 (4.2%)      | ns            | 15.6 ± 0.0   | 14.8 ± 0         | <b>0.025</b>  |

|                         |               |              |    |                |               |    |
|-------------------------|---------------|--------------|----|----------------|---------------|----|
| Systemic score $\geq 7$ | 10/32 (31.3%) | 9/23 (39.1%) | ns | 10.6 $\pm$ 5.9 | 9.7 $\pm$ 4.8 | ns |
|-------------------------|---------------|--------------|----|----------------|---------------|----|

**Table S5** Cardiovascular genotype-phenotype correlations (YOP, year of publication; cys-missense, missense mutations involving a cysteine; non-cys, missense mutations not involving a cysteine; PTC, premature termination codon; HI, haploinsufficiency; DN, dominant-negative; cardiovasc, cardiovascular; SV-Dil, sinus of Valsalva dilatation; PA-Dil, pulmonary artery dilatation; TVP, tricuspid valve prolapse; MVP, mitral valve prolapse).

| Authors              | YOP  | Results                                                                                                                                            |
|----------------------|------|----------------------------------------------------------------------------------------------------------------------------------------------------|
| Loeys et al.         | 2004 | No difference of cardiovasc. involvement (cys-miss/PTC)                                                                                            |
| Waldmüller et al.    | 2007 | No difference of cardiovasc. involvement (cys-miss/PTC)                                                                                            |
| Detaint et al.       | 2010 | More aortic dilatation, aortic events, and MVP in cys-missense                                                                                     |
| Baudhuin et al.      | 2014 | More+earlier aortic events in in truncating+splicing variants than missense                                                                        |
| Aubart et al.        | 2015 | More aortic dilatation if low level of Wild-type <i>FBN1</i> mRNA                                                                                  |
| Yang et al.          | 2016 | More aortic involvement in truncating or splicing variants than missense                                                                           |
| Franken et al.       | 2017 | More aortic phenotype in HI (larger, more rapid dilatation, increased risk of death and dissections) than in DN                                    |
| Salvi et al. [53]    | 2017 | Same aortic stiffness in HI and DN                                                                                                                 |
| Seo et al.           | 2018 | More aortic dilatation in cys-missense than in non-cys-missense                                                                                    |
| Becerra-Munoz et al. | 2018 | More aortic events in truncating (nonsense, frameshift) than in missense                                                                           |
| Takeda et al.        | 2018 | More SV-Dil, aortic events in HI than DN<br>More SV-Dil, aortic events in DN-cys than DN-non-cys<br>Same risk aortic events in HI and DN-cys       |
| Li et al.            | 2019 | More aortic dissection in HI than DN                                                                                                               |
| Gao et al.           | 2019 | More cardiovasc. involvement in PTC than in non-PTC<br>More cardiovasc. involvement in cys-missense<br>More cardiovasc. involvement in exons 43–65 |
| Xu et al.            | 2020 | More aortic dissection in HI (frameshift + nonsense) than in missense                                                                              |
| Stark et al.         | 2020 | More SV-Dil, TVP, medication in cys-missense than in non-cys-missense<br>Earlier PA-Dil in missense/in-frame than in nonsense/frameshift           |

**Table S6** Ocular genotype-phenotype correlations (YOP, year of publication; EL, ectopia lentis, cys-missense, missense mutations involving a cysteine; non-cys, missense mutations not involving a cysteine; PTC, premature termination codon; HI, haploinsufficiency; DN, dominant-negative)

| Authors          | YOP          | Results                             |
|------------------|--------------|-------------------------------------|
| Schriever et al. | 1999<br>2002 | More EL in cys-missense than in PTC |
| Comeglio et al.  | 2002         | More EL in missense exons 1–15      |

|                      |              |                                                                                                            |
|----------------------|--------------|------------------------------------------------------------------------------------------------------------|
| Biggin et al. [54]   | 2004         | More EL in cys-missense than in PTC                                                                        |
| Loeys et al.         | 2004<br>2007 | More EL in cys-missense than in PTC                                                                        |
| Comeglio et al.      | 2007         | More EL in cys-missense than nonsense/frameshift                                                           |
| Rommel et al.        | 2005         | More EL in cys-missense than PTC or non-cys missense                                                       |
| Faivre et al.        | 2007         | More EL in cys-missense than in other missense                                                             |
| Aubart et al.        | 2015         | More EL if low level of wild-type <i>FBN1</i> mRNA                                                         |
| Baudhuin et al.      | 2015         | More EL in cys-missense than in other missense                                                             |
| Seo et al.           | 2018         | More EL in missense than in other mutations                                                                |
| Becerra-Munoz et al. | 2018         | More EL in missense than nonsense, frameshift                                                              |
| Li et al.            | 2019         | More EL in DN than in HI<br>More EL in cys-missense than in PTC                                            |
| Gao et al.           | 2019         | More EL in cys-missense<br>More EL in non-PTC than PTC<br>More EL in missense than frameshift              |
| Stark et al.         | 2020         | More EL in missense than in nonsense/frameshift<br>Earlier myopia in cys-missense than in non-cys-missense |

**Table S7** Skeleton, skin, lung and dural genotype-phenotype correlations (YOP, year of publication; cys-missense, missense mutations involving a cysteine; non-cys, missense mutations not involving a cysteine; PTC, premature termination codon; HI, haploinsufficiency; DN, dominant-negative)

| Authors              | YOP  | Results                                                                                                                                                                    |
|----------------------|------|----------------------------------------------------------------------------------------------------------------------------------------------------------------------------|
| Schrijver et al.     | 2002 | More skeletal involvement in PTC than in cys-missense                                                                                                                      |
| Loeys et al.         | 2004 | More skeletal in PTC than in cys-missense                                                                                                                                  |
| Rommel et al.        | 2005 | More skeletal in splice than PTC                                                                                                                                           |
| Faivre et al.        | 2007 | More skeletal involvement in PTC than in in-frame<br>More skin involvement in PTC than in in-frame                                                                         |
| Comeglio et al.      | 2007 | More skeletal involvement in nonsense/frameshift than cys-missense                                                                                                         |
| Haine et al.         | 2015 | More musculoskeletal in PTC than in in-frame                                                                                                                               |
| Aubart et al.        | 2015 | More pectus abnormality if low level of wild-type <i>FBN1</i> mRNA                                                                                                         |
| Franken et al.       | 2015 | More pectus carinatum in HI than DN<br>More dural ectasia in HI than DN<br>More skin striae in HI than DN                                                                  |
| Seo et al.           | 2018 | Less dural ectasia in missense mutations than other variants                                                                                                               |
| Becerra-Munoz et al. | 2018 | More positive systemic score in truncating (nonsense, frameshift) than in missense                                                                                         |
| Stark et al.         | 2020 | More pectus excavatum in splicing than missense/in-frame<br>Earlier hernias in missense/ in-frame than splicing<br>More dural ectasia in nonsense/frameshift than missense |
