# Supplementary material for: Genotype–Phenotype Correlation in Children: The Impact of FBN1 Variants on Pediatric Marfan Care
Source: MDPI journal article supplement (doi:10.3390/genes11070799), 2020-07-15
Supplement: s1 [file s1]

### Supplementary Data

*FBN1* variants of our pediatric Marfan collective included in this study.

|                                                                                                                                                            |                |
|------------------------------------------------------------------------------------------------------------------------------------------------------------|----------------|
| <b>(1) variants affecting a single or several codons, such as missense variants and in-frame deletions, that leave the reading frame intact.</b>           |                |
| <b>Missense variants have been subdivided into those destroying or creating a cysteine and those affecting another highly conserved amino acid residue</b> |                |
| <b>cys-missense</b>                                                                                                                                        |                |
| c.184C>T                                                                                                                                                   | p.(Arg62Cys)   |
| c.304T>C                                                                                                                                                   | p.(Cys102Arg)  |
| c.496T>C                                                                                                                                                   | p.(Cys166Arg)  |
| c.718C>T                                                                                                                                                   | p.(Arg240Cys)  |
| c.718C>T                                                                                                                                                   | p.(Arg240Cys)  |
| c.1663T>C                                                                                                                                                  | p.(Cys555Arg)  |
| c.2342G>A                                                                                                                                                  | p.(Cys781Tyr)  |
| c.2688T>G                                                                                                                                                  | p.(Cys896Trp)  |
| c.2722T>C                                                                                                                                                  | p.(Cys908Arg)  |
| c.2849G>T                                                                                                                                                  | p.(Cys950Phe)  |
| c.2860C>T                                                                                                                                                  | p.(Arg954Cys)  |
| c.3419G>A                                                                                                                                                  | p.(Cys1140Tyr) |
| c.3533A>G                                                                                                                                                  | p.(Tyr1178Cys) |
| c.4015T>C                                                                                                                                                  | p.(Cys1339Arg) |
| c.4172G>T                                                                                                                                                  | p.(Cys1391Phe) |
| c.4506T>G                                                                                                                                                  | p.(Cys1502Trp) |
| c.4538G>C                                                                                                                                                  | p.(Cys1513Ser) |
| c.4538G>C                                                                                                                                                  | p.(Cys1513Ser) |
| c.5009A>G                                                                                                                                                  | p.(Tyr1670Cys) |
| c.5009A>G                                                                                                                                                  | p.(Tyr1670Cys) |
| c.5020T>A                                                                                                                                                  | p.(Cys1674Ser) |
| c.5497T>G                                                                                                                                                  | p.(Cys1833Gly) |
| c.6049T>C                                                                                                                                                  | p.(Cys2017Arg) |
| c.6490T>A                                                                                                                                                  | p.(Cys2164Ser) |
| c.6628T>C                                                                                                                                                  | p.(Cys2210Arg) |
| c.7094G>A                                                                                                                                                  | p.(Cys2365Tyr) |
| c.7252T>C                                                                                                                                                  | p.(Cys2418Arg) |
| c.7252T>C                                                                                                                                                  | p.(Cys2418Arg) |
| c.7648T>G                                                                                                                                                  | p.(Cys2550Gly) |
| c.7814G>A                                                                                                                                                  | p.(Cys2605Tyr) |
| c.7976G>A                                                                                                                                                  | p.(Cys2659Tyr) |

|                                                                                                                                                                                                                                                                                                                                                                                                |                        |
|------------------------------------------------------------------------------------------------------------------------------------------------------------------------------------------------------------------------------------------------------------------------------------------------------------------------------------------------------------------------------------------------|------------------------|
| <b>non-cys-missense</b>                                                                                                                                                                                                                                                                                                                                                                        |                        |
| c.248C>T                                                                                                                                                                                                                                                                                                                                                                                       | p.(Pro83Leu)           |
| c.467A>G                                                                                                                                                                                                                                                                                                                                                                                       | p.(Asn156Ser)          |
| c.640G>A                                                                                                                                                                                                                                                                                                                                                                                       | p.(Gly214Ser)          |
| c.821C>A                                                                                                                                                                                                                                                                                                                                                                                       | p.(Pro274His)          |
| c.3037G>A                                                                                                                                                                                                                                                                                                                                                                                      | p.(Gly1013Arg)         |
| c.3463G>A                                                                                                                                                                                                                                                                                                                                                                                      | p.(Asp1155Asn)         |
| c.4340T>G                                                                                                                                                                                                                                                                                                                                                                                      | p.(Ile1447Ser)         |
| c.5339G>C                                                                                                                                                                                                                                                                                                                                                                                      | p.(Gly1780Ala)         |
| c.5431G>A                                                                                                                                                                                                                                                                                                                                                                                      | p.(Glu1811Lys)         |
| c.6055G>A                                                                                                                                                                                                                                                                                                                                                                                      | p.(Glu2019Lys)         |
| c.6055G>A                                                                                                                                                                                                                                                                                                                                                                                      | p.(Glu2019Lys)         |
| c.6388G>A                                                                                                                                                                                                                                                                                                                                                                                      | p.(Glu2130Lys)         |
| c.6388G>A                                                                                                                                                                                                                                                                                                                                                                                      | p.(Glu2130Lys)         |
| c.6431A>G                                                                                                                                                                                                                                                                                                                                                                                      | p.(Asn2144Ser)         |
| c.6617A>T                                                                                                                                                                                                                                                                                                                                                                                      | p.(Asp2206Val)         |
| c.6700G>A                                                                                                                                                                                                                                                                                                                                                                                      | p.(Val2234Met)         |
| c.7606G>A                                                                                                                                                                                                                                                                                                                                                                                      | p.(Gly2536Arg)         |
| c.7606G>A                                                                                                                                                                                                                                                                                                                                                                                      | p.(Gly2536Arg)         |
| c.7661G>A                                                                                                                                                                                                                                                                                                                                                                                      | p.(Arg2554Gln)         |
| c.7661G>A                                                                                                                                                                                                                                                                                                                                                                                      | p.(Arg2554Gln)         |
| c.7661G>A                                                                                                                                                                                                                                                                                                                                                                                      | p.(Arg2554Gln)         |
| c.7754T>C                                                                                                                                                                                                                                                                                                                                                                                      | p.(Ile2585Thr)         |
| c.7858G>A                                                                                                                                                                                                                                                                                                                                                                                      | p.(Ala2620Thr)         |
| c.8055C>A                                                                                                                                                                                                                                                                                                                                                                                      | p.(His2685Gln)         |
| <b>In-frame</b>                                                                                                                                                                                                                                                                                                                                                                                |                        |
| c.699_701delTGG                                                                                                                                                                                                                                                                                                                                                                                | p.(Gly234del)          |
| c.5076_5078delAAG                                                                                                                                                                                                                                                                                                                                                                              | p.(Arg1692del)         |
| c.5076_5078delAAG                                                                                                                                                                                                                                                                                                                                                                              | p.(Arg1692del)         |
| c.6038_6163del                                                                                                                                                                                                                                                                                                                                                                                 | p.(Ile2014_Asp2055del) |
| <b>(2) splice site variants, including intronic variants affecting one of the two invariable nucleotides of the splice acceptor or donor site, other intronic variants for which the in silico tools varseek/HumanSplicingFinder/MaxEntSc an predicted an effect on pre-mRNA splicing, and a synonymous variant for which aberrant pre-mRNA splicing has been experimentally demonstrated.</b> |                        |
| <b>splicing</b>                                                                                                                                                                                                                                                                                                                                                                                |                        |
| c.247+1G>A                                                                                                                                                                                                                                                                                                                                                                                     |                        |
| c.247+1G>A                                                                                                                                                                                                                                                                                                                                                                                     |                        |
| c.1589-2A>C                                                                                                                                                                                                                                                                                                                                                                                    |                        |
| c.2168-1G>C                                                                                                                                                                                                                                                                                                                                                                                    |                        |
| c.2168-1G>T                                                                                                                                                                                                                                                                                                                                                                                    |                        |

|                                                                                                                                                                                    |                      |
|------------------------------------------------------------------------------------------------------------------------------------------------------------------------------------|----------------------|
| c.3083-2A>C                                                                                                                                                                        |                      |
| c.3338-2A>G                                                                                                                                                                        |                      |
| c.3338-3_3346delCAGATATTGATG                                                                                                                                                       |                      |
| c.4211-1G>A                                                                                                                                                                        |                      |
| c.4817-1G>T                                                                                                                                                                        |                      |
| c.4460-8G>A                                                                                                                                                                        |                      |
| c.4943-1G>A                                                                                                                                                                        |                      |
| c.4943-1G>A                                                                                                                                                                        |                      |
| c.6453C>T                                                                                                                                                                          | p.Cys2151=           |
| <b>(3) variants introducing a premature stop codon, such as nonsense and frameshift variants, and one deletion of the entire FBN1 gene, all likely leading to loss-of-function</b> |                      |
| <b>frameshift</b>                                                                                                                                                                  |                      |
| c.532delG                                                                                                                                                                          | p.(Glu178Lysfs*12)   |
| c.653dupG                                                                                                                                                                          | p.(His219Profs*4)    |
| c.1383_1390dup                                                                                                                                                                     | p.(Arg464Glnfs*118)  |
| c.3220_3223delC AAT                                                                                                                                                                | p.(Cys1074Alafs*13)  |
| c.3929delG                                                                                                                                                                         | p.(Gly1310Alafs*103) |
| c.4639dupA                                                                                                                                                                         | p.(Thr1547Asnfs*6)   |
| c.4726_4728delin sGTACTCCT                                                                                                                                                         | p.(Met1576Valfs*7)   |
| c.4726_4728delin sGTACTCCT                                                                                                                                                         | p.(Met1576Valfs*7)   |
| c.4726_4728delin sGTACTCCT                                                                                                                                                         | p.(Met1576Valfs*7)   |
| c.5259_5262delA GGC                                                                                                                                                                | p.(Gly1754Leufs*138) |
| c.5722delA                                                                                                                                                                         | p.(Thr1908Glnfs*22)  |
| c.5817delG                                                                                                                                                                         | p.(Asn1940Ilefs*40)  |
| c.7039_7040delA T                                                                                                                                                                  | p.(Met2347Valfs*19)  |
| c.7039_7040delA T                                                                                                                                                                  | p.(Met2347Valfs*19)  |
| c.7148delC                                                                                                                                                                         | p.(Thr2383Metfs*15)  |
| c.7148delC                                                                                                                                                                         | p.(Thr2383Metfs*15)  |
| c.7945_7946delA T                                                                                                                                                                  | p.(Ile2649Glnfs*2)   |
| c.8524_8528delC TTAA                                                                                                                                                               | p.(Leu2842Profs*7)   |
| <b>nonsense</b>                                                                                                                                                                    |                      |
| c.1090C>T                                                                                                                                                                          | p.(Arg364*)          |
| c.1546C>T                                                                                                                                                                          | p.(Arg516*)          |
| c.2670C>A                                                                                                                                                                          | p.(Cys890*)          |

|                                         |                |
|-----------------------------------------|----------------|
| c.2670C>A                               | p.(Cys890*)    |
| c.3797dup                               | p.(Tyr1266*)   |
| c.6169C>T                               | p.(Arg2057*)   |
| c.7045C>T                               | p.(Gln2349*)   |
| c.7180C>T                               | p.(Arg2394*)   |
| c.7240C>T                               | p.(Arg2414*)   |
| c.8386G>T                               | p.(Glu2796*)   |
| <b>deletion of the entire FBN1 gene</b> |                |
| 15.q21.1q21.2(48,293,311_49,694,462)x1  | (hg19, GRCh37) |
